# Supplementary material
Source: PubMed Central journal article supplement (PMC4249113)
Supplement: JVI.02333-14_zjv999099823so1.pdf [file JVI.02333-14_zjv999099823so1.pdf]

|         | relative cell surface expression |            |            |                    | relative cell surface expression |            |            |
|---------|----------------------------------|------------|------------|--------------------|----------------------------------|------------|------------|
|         | mean +/- SD                      |            |            |                    | mean +/- SD                      |            |            |
|         | HIV-1 Nef                        | HIV-1 Vpu  | SIVmac Nef |                    | HIV-1 Nef                        | HIV-1 Vpu  | SIVmac Nef |
| CD4v4   | 6 +/- 0                          | 32 +/- 2   | 17 +/- 6   | CD28               | 76 +/- 5                         | 89 +/- 14  | 65 +/- 12  |
| CD4     | 7 +/- 0                          | 33 +/- 2   | 21 +/- 7   | CD132              | 77 +/- 15                        | 80 +/- 23  | 123 +/- 18 |
| CD37    | 25 +/- 2                         | 58 +/- 2   | 61 +/- 4   | CD29               | 78 +/- 5                         | 99 +/- 6   | 96 +/- 6   |
| b2m     | 26 +/- 1                         | 62 +/- 11  | 69 +/- 6   | CD226              | 79 +/- 2                         | 105 +/- 11 | 66 +/- 14  |
| HLA-ABC | 29 +/- 3                         | 68 +/- 13  | 72 +/- 6   | CD268              | 79 +/- 4                         | 101 +/- 10 | 99 +/- 4   |
| CD81    | 30 +/- 4                         | 63 +/- 4   | 82 +/- 17  | CD99               | 79 +/- 1                         | 101 +/- 12 | 100 +/- 0  |
| CD107a  | 37 +/- 3                         | 56 +/- 5   | 108 +/- 14 | CD147              | 80 +/- 4                         | 99 +/- 6   | 98 +/- 3   |
| CD108   | 37 +/- 1                         | 76 +/- 26  | 95 +/- 11  | CD165              | 80 +/- 4                         | 84 +/- 21  | 101 +/- 3  |
| CD109   | 44 +/- 2                         | 74 +/- 12  | 87 +/- 7   | CD229              | 80 +/- 10                        | 82 +/- 22  | 122 +/- 1  |
| CD100   | 46 +/- 3                         | 63 +/- 24  | 97 +/- 12  | CD18               | 81 +/- 8                         | 91 +/- 12  | 92 +/- 10  |
| CD102   | 48 +/- 2                         | 65 +/- 18  | 72 +/- 7   | CD72               | 81 +/- 10                        | 86 +/- 19  | 102 +/- 0  |
| CD164   | 48 +/- 5                         | 43 +/- 10  | 122 +/- 19 | CD201              | 81 +/- 15                        | 89 +/- 16  | 110 +/- 9  |
| CD30    | 49 +/- 4                         | 81 +/- 38  | 107 +/- 23 | CD6                | 82 +/- 7                         | 89 +/- 11  | 101 +/- 4  |
| CD48    | 49 +/- 6                         | 70 +/- 15  | 77 +/- 11  | CD38               | 82 +/- 14                        | 90 +/- 25  | 60 +/- 11  |
| CD53    | 49 +/- 2                         | 77 +/- 22  | 69 +/- 4   | CD321              | 82 +/- 1                         | 88 +/- 14  | 89 +/- 0   |
| CD227   | 49 +/- 1                         | 79 +/- 12  | 65 +/- 6   | CD195              | 83 +/- 5                         | 88 +/- 21  | 91 +/- 6   |
| CD231   | 50 +/- 6                         | 53 +/- 7   | 88 +/- 11  | CD84               | 84 +/- 2                         | 86 +/- 7   | 89 +/- 9   |
| CD27    | 51 +/- 6                         | 58 +/- 12  | 100 +/- 33 | CD98               | 84 +/- 7                         | 104 +/- 7  | 105 +/- 7  |
| CD63    | 51 +/- 2                         | 62 +/- 5   | 103 +/- 4  | CD45RA             | 84 +/- 2                         | 93 +/- 7   | 92 +/- 5   |
| CD62L   | 54 +/- 4                         | 68 +/- 3   | 70 +/- 14  | CD57               | 84 +/- 17                        | 109 +/- 3  | 85 +/- 8   |
| CD46    | 55 +/- 2                         | 83 +/- 13  | 84 +/- 3   | CD271              | 84 +/- 9                         | 96 +/- 16  | 106 +/- 14 |
| CD107b  | 55 +/- 3                         | 67 +/- 5   | 125 +/- 23 | CD326              | 84 +/- 6                         | 86 +/- 9   | 104 +/- 5  |
| CD120a  | 56 +/- 6                         | 85 +/- 14  | 92 +/- 7   | CD5                | 84 +/- 7                         | 88 +/- 8   | 81 +/- 4   |
| CD7     | 56 +/- 10                        | 65 +/- 5   | 101 +/- 4  | CD31               | 86 +/- 6                         | 99 +/- 10  | 101 +/- 5  |
| CD71    | 56 +/- 14                        | 40 +/- 7   | 135 +/- 23 | CD55               | 86 +/- 9                         | 104 +/- 15 | 94 +/- 7   |
| CD183   | 57 +/- 3                         | 77 +/- 9   | 75 +/- 11  | CD43               | 87 +/- 7                         | 83 +/- 14  | 100 +/- 2  |
| CD1d    | 57 +/- 6                         | 74 +/- 4   | 92 +/- 13  | CD150              | 87 +/- 2                         | 106 +/- 4  | 100 +/- 1  |
| CD130   | 59 +/- 2                         | 90 +/- 18  | 111 +/- 6  | CD8a               | 89 +/- 4                         | 95 +/- 12  | 75 +/- 5   |
| CD184   | 61 +/- 6                         | 76 +/- 10  | 72 +/- 0   | CD45RB             | 89 +/- 17                        | 93 +/- 14  | 97 +/- 1   |
| CD119   | 62 +/- 2                         | 67 +/- 15  | 99 +/- 1   | CD163              | 90 +/- 2                         | 85 +/- 12  | 99 +/- 0   |
| CD120b  | 62 +/- 3                         | 77 +/- 24  | 109 +/- 9  | CD11a              | 91 +/- 10                        | 94 +/- 14  | 95 +/- 10  |
| CD305   | 62 +/- 1                         | 93 +/- 11  | 88 +/- 6   | CD61               | 92 +/- 2                         | 94 +/- 11  | 105 +/- 1  |
| CD151   | 63 +/- 6                         | 89 +/- 15  | 86 +/- 7   | CD54               | 92 +/- 8                         | 118 +/- 34 | 96 +/- 7   |
| CD83    | 64 +/- 1                         | 67 +/- 6   | 86 +/- 16  | CD244              | 93 +/- 16                        | 119 +/- 30 | 119 +/- 1  |
| SSEA-4  | 64 +/- 8                         | 130 +/- 3  | 82 +/- 7   | CD45               | 93 +/- 2                         | 110 +/- 10 | 105 +/- 5  |
| CD235a  | 65 +/- 3                         | 74 +/- 9   | 96 +/- 3   | CD80               | 93 +/- 2                         | 97 +/- 17  | 101 +/- 2  |
| CD15    | 66 +/- 12                        | 112 +/- 60 | 88 +/- 7   | CD97               | 95 +/- 13                        | 84 +/- 22  | 108 +/- 3  |
| CD197   | 66 +/- 2                         | 77 +/- 13  | 91 +/- 5   | CD49e              | 96 +/- 11                        | 99 +/- 13  | 109 +/- 4  |
| CD99R   | 68 +/- 2                         | 100 +/- 15 | 90 +/- 5   | CD166              | 98 +/- 3                         | 96 +/- 6   | 101 +/- 1  |
| CD142   | 68 +/- 1                         | 97 +/- 14  | 93 +/- 7   | CD49f              | 100 +/- 3                        | 105 +/- 5  | 82 +/- 1   |
| CD127   | 70 +/- 1                         | 86 +/- 6   | 96 +/- 7   | CD50               | 100 +/- 4                        | 95 +/- 9   | 104 +/- 4  |
| CD275   | 71 +/- 4                         | 105 +/- 11 | 68 +/- 4   | CD44               | 101 +/- 5                        | 106 +/- 6  | 114 +/- 2  |
| CD87    | 72 +/- 8                         | 103 +/- 34 | 94 +/- 3   | CD49b              | 102 +/- 8                        | 103 +/- 9  | 114 +/- 1  |
| CD15s   | 72 +/- 4                         | 82 +/- 10  | 102 +/- 4  | CD49d              | 103 +/- 10                       | 98 +/- 0   | 110 +/- 1  |
| CD278   | 72 +/- 11                        | 90 +/- 15  | 84 +/- 3   | CD49c              | 105 +/- 10                       | 97 +/- 12  | 108 +/- 0  |
| CD58    | 72 +/- 5                         | 100 +/- 1  | 85 +/- 1   | CD3                | 111 +/- 6                        | 89 +/- 25  | 50 +/- 18  |
| CD134   | 73 +/- 7                         | 93 +/- 2   | 101 +/- 0  | CD171              | 117 +/- 16                       | 97 +/- 23  | 92 +/- 3   |
| SSEA-1  | 73 +/- 10                        | 85 +/- 19  | 91 +/- 1   | CD45RO             | 121 +/- 5                        | 123 +/- 38 | 136 +/- 3  |
| CD2     | 74 +/- 2                         | 92 +/- 0   | 95 +/- 5   | CD205              | 123 +/- 4                        | 85 +/- 6   | 94 +/- 4   |
| CD59    | 74 +/- 6                         | 109 +/- 7  | 97 +/- 2   | integrin $\beta$ 7 | 124 +/- 19                       | 101 +/- 19 | 122 +/- 3  |
| CD162   | 74 +/- 3                         | 76 +/- 14  | 90 +/- 4   | CD10               | 125 +/- 15                       | 124 +/- 27 | 116 +/- 12 |
| CD47    | 75 +/- 2                         | 103 +/- 1  | 92 +/- 0   | CD69               | 168 +/- 78                       | 139 +/- 74 | 96 +/- 22  |
| CD96    | 76 +/- 4                         | 96 +/- 4   | 98 +/- 3   |                    |                                  |            |            |

## Supplemental Figure Legends

Supplement Table 1. Relative expression of surface markers in the presence of Nef or Vpu.

Complete list of the identified relative surface expression of all markers from the Lyoplate™ Screening Panel which gained signals above background levels (isotype controls) (as explained in legend to FIG. 1). The values show the mean % surface expression of transfected relative to untransfected A3.01 cells (MFI of R3/R2) +/- standard deviation (SD) from three independent experiments. The markers are ordered according to the identified surface levels upon HIV-1 Nef expression.
